# Supplementary material
Source: PubMed Central journal article supplement (PMC2807296)
Supplement: supp_M109.039081_jbc.M109.039081-1.pdf [file supp_M109.039081_jbc.M109.039081-1.pdf]

**Table S1: Sequences of the primers used for the site-directed mutagenesis of the rPKD4 promoter.**

| Promoter region | Primer sequence                                                         |
|-----------------|-------------------------------------------------------------------------|
| DR4 -1112 FP    | 5'-GAGGGCTAAGGGCACCTTGA <b>ACA</b> CAAACTGCCTTTGCTGC-3'                 |
| DR4 -1112 RP    | 5'-CTCCCGATTCCCGTGGA <b>ACTT</b> GTTGTTTGACGGAAACGACG-3'                |
| DR4 -1173 FP    | 5'-GCAAAGTAAGAGTGCACCTAG <b>TTCC</b> ACCCATGACTTTCATCACAC -3'           |
| DR4 -1173 RP    | 5'-GTGTGATGAAAGTCATGGGT <b>GGA</b> ACTAGGTGCACTCTTACTTTGC -3'           |
| Mut -338 FP     | 5'-AGATGGCTCCTGAGTTGTAA <b>CAAAA</b> ACAAGTCTGGGCGGG-3'                 |
| Mut -338 RP     | 5'-CCCGCCAGACTTGT <b>TTTT</b> TGTTACA <b>ACT</b> CAGGAGCCATCT-3'        |
| Mut -347 FP     | 5'-TGACATTGAGATGGCTCCTGAG <b>TTTG</b> CAACAAGGACAAGTCTGGGC-3'           |
| Mut -347 RP     | 5'-GCCCAGACTTGT <b>CCTT</b> GT <b>GCA</b> AACTCAGGAGCCATCTCAATGTCA-3'   |
| Mut -370 FP     | 5'-CAGTTTCTGGCGAGGAATGCGT <b>TT</b> CGTGAGATGGCTCCTGAGTTGTAA-3'         |
| Mut -370 RP     | 5'-TTACA <b>ACT</b> CAGGAGCCATCTCAC <b>GAA</b> CACGCATTCTCGCCAGAACTG-3' |

**Table S2: Sequences of the primers used in the ChIP assay to demonstrate interactions of TR $\beta$  and PGC-1 $\alpha$  with the different genes.**

---

|                                   |                        |
|-----------------------------------|------------------------|
| Rat CPT-1a -3079/-2825 (TRE site) |                        |
| FP:                               | GACAGGCAGGGTACATTTACAG |
| RP:                               | GAAGGCAGTGCTTTTCCCTAC  |
| <br>                              |                        |
| Rat CPT1a +927/+674 (intron)      |                        |
| FP:                               | AGACTGCTCAAGGTCGCGCT   |
| RP:                               | GAGAGTCCTGAGCCTGATTGT  |
| <br>                              |                        |
| Rat CPT1a -6473/-6099 (upstream)  |                        |
| FP:                               | CTCTGGTGTCTGTAACTGTGG  |
| RP:                               | GAAGGCTGGAATTACTGGTCAG |
| <br>                              |                        |
| Rat PEPCK -512/-267               |                        |
| FP:                               | AACTCGGCTGTTGCAGACTT   |
| RP:                               | CATCAGCAACAGTCACGGTC   |
| <br>                              |                        |
| Rat PDK4 -1535/-1228 (TRE site)   |                        |
| FP:                               | AGTGTCTCCACCAGATTGT    |
| RP:                               | CTAAGAGAGCTAACCTAGT    |
| <br>                              |                        |
| Rat PDK4 -591/-338 (proximal)     |                        |
| FP:                               | CACAGTAATAATAAGGCTAT   |
| RP:                               | ACTCAGGAGCCATCTCAATG   |
| <br>                              |                        |
| Rat PDK4 -6634/-6377 (upstream)   |                        |
| FP:                               | TATGAGAAGTGCTGCAATAA   |
| RP:                               | CCAGACTTGTCTTGTTTAC    |

---

**Table S3: Sequences of the primers used for real time PCR.**

| Primer             | Primer sequence          |
|--------------------|--------------------------|
| rPDK4 FP           | GGATTACTGACCGCCTCTTTAGTT |
| rPDK4 RP           | GCATTCCGTGAATTGTCCATC    |
| rPGC-1 $\alpha$ FP | ATGAATGCAGCGGTCTTAGC     |
| rPGC-1 $\alpha$ RP | AACAATGGCAGGGTTTGTTTC    |
| rCPT-1a FP         | CGGTTCAAGAATGGCATCATC    |
| rCPT-1a RP         | TCACACCCACCACCACGAT      |
| r18S FP            | CGGCTACCACATCCAAGGAA     |
| r18S RP            | TTTTCGTCACTACCTCCCCG     |
